# Supplementary material for: High CRLF2 expression associates with IKZF1 dysfunction in adult acute lymphoblastic leukemia without CRLF2 rearrangement
Source: PubMed Central journal article supplement (PMC5226542; doi:10.18632/oncotarget.10437), 2016-07-06
Supplement: oncotarget-07-49722-s001.pdf [file oncotarget-07-49722-s001.pdf]

## High *CRLF2* expression associates with *IKZF1* dysfunction in adult acute lymphoblastic leukemia without *CRLF2* rearrangement

### Supplementary Materials

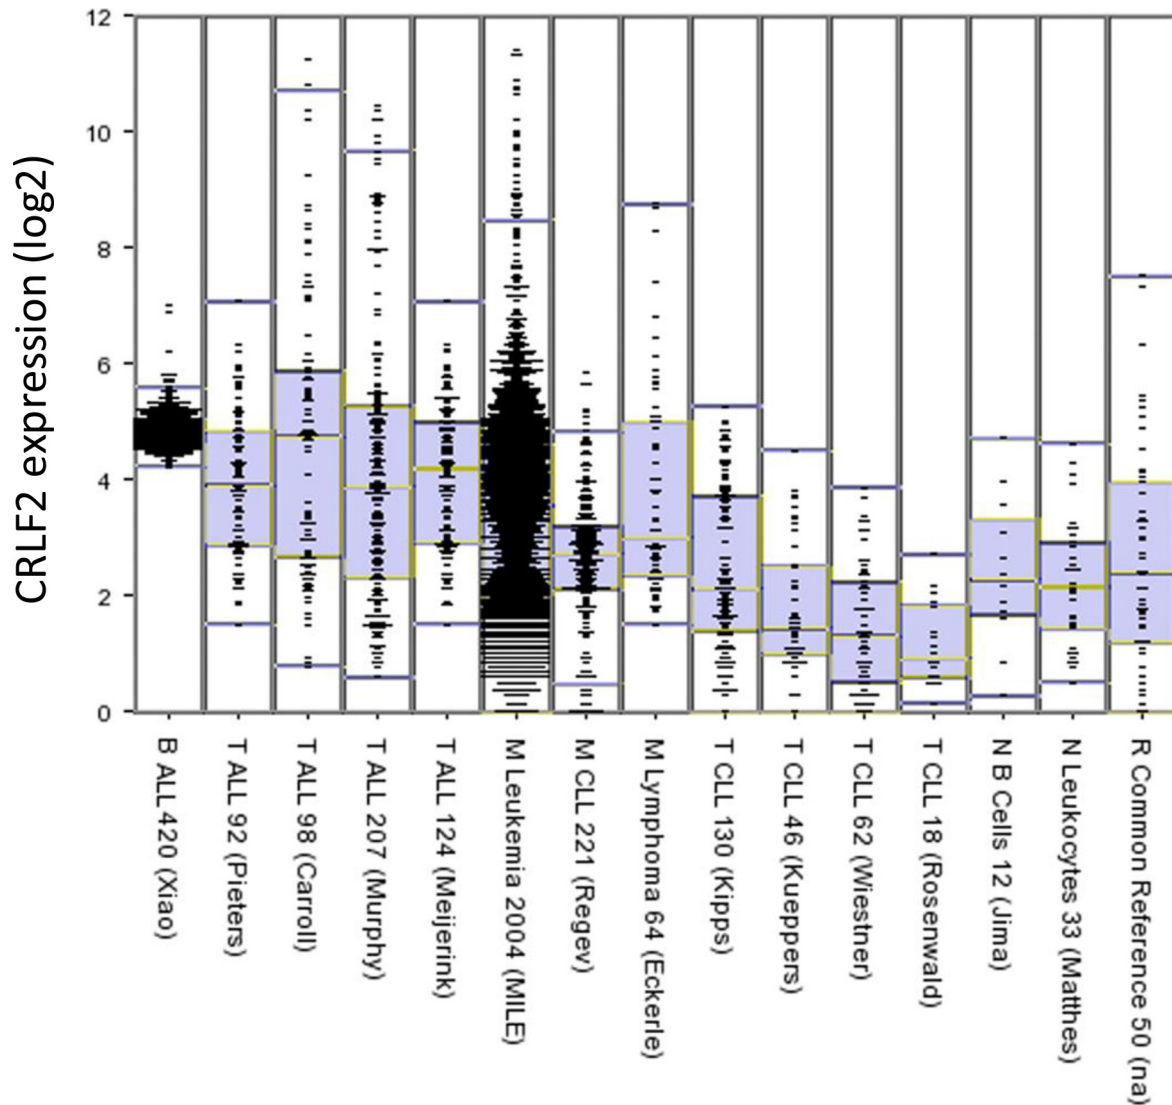

**Supplementary Figure S1: CRLF2 high expression in ALL cohort study.** The microarray data for CRLF2 (208303\_s\_at) expression generated with MegaSampler ( $n = 3581$ , MAS5.0) from human oncogenomics sever crossing all microarray database, which includes B-ALL, T-ALL, Mixed ALL (M ALL), T-CLL, and normal control (N B cells, N leukocytes and common reference) cohort studies.

**Supplementary Table S1: Correlation of CRLF2 expression with clinical features in adult B-ALL**

| Characteristics                 | High CRLF2 expression<br>(N = 29) | Low CRLF2 expression<br>(N=36) | P value |
|---------------------------------|-----------------------------------|--------------------------------|---------|
| Age (years)                     |                                   |                                |         |
| median (range)                  | 38.5(14.0–77.0)                   | 27.0(14.0–70.0)                | 0.418   |
| Sex (%)                         |                                   |                                |         |
| male                            | 48.3                              | 52.8                           | 0.718   |
| WBC, ×10 <sup>9</sup> /L        |                                   |                                |         |
| median (range)                  | 45.8(3.0–488.0)                   | 19.4(0.9–398.4)                | 0.035   |
| ≥ 30 × 10 <sup>9</sup> /L       | 85.7                              | 38.9                           | 0.000   |
| HGB, g/L                        |                                   |                                |         |
| median (range)                  | 89.0(48.0–150.0)                  | 90.0(44.0–157.0)               | 0.765   |
| PLT, ×10 <sup>9</sup> /L        |                                   |                                |         |
| median (range)                  | 47.0(8.0–269.0)                   | 35.0(4.0–292.0)                | 0.529   |
| LDH (u/L)                       |                                   |                                |         |
| median (range)                  | 592.0(214.0–3257.0)               | 753.0(175.0–7142.0)            | 0.516   |
| Blasts (%) median range         |                                   |                                |         |
| bone marrow                     | 90.4(66.0–97.0)                   | 88.8(47.0–100.0)               | 0.533   |
| peripheral blood                | 80.5(34.0–97.0)                   | 70.0(0.0–100.0)                | 0.051   |
| Immune phenotype, %             |                                   |                                |         |
| CD34+                           | 85.7                              | 55.6                           | 0.010   |
| CD13+                           | 60.7                              | 33.3                           | 0.029   |
| CD33+                           | 59.3                              | 30.6                           | 0.023   |
| Extramedullary infiltration (%) |                                   |                                |         |
| liver                           | 24.1                              | 8.8                            | 0.189   |
| spleen                          | 58.6                              | 27.8                           | 0.012   |
| lymph node                      | 41.4                              | 47.1                           | 0.651   |
| Genetics (%)                    |                                   |                                |         |
| <i>IKZF1</i> deletion (IK6)     | 31.0                              | 8.3                            | 0.019   |
| BCR/ABL1 fusion gene(Ph+)       | 53.8                              | 34.3                           | 0.127   |
| complex karyotype               | 15.8                              | 21.7                           | 0.925   |

**Supplementary Table S2: Correlation of CRLF2 expression with clinical features in adult T-ALL**

| Characteristics                 | High CRLF2 expression<br>(N = 21) | Low CRLF2 expression<br>(N = 14) | P value |
|---------------------------------|-----------------------------------|----------------------------------|---------|
| Age (years)                     |                                   |                                  |         |
| median (range)                  | 27.0(14.0–54.0)                   | 32.5(14.0–49.0)                  | 0.606   |
| Sex (%)                         |                                   |                                  |         |
| male                            | 81.0                              | 78.6                             | 1.000   |
| WBC, ×10 <sup>9</sup> /L        |                                   |                                  |         |
| median (range)                  | 82.0(3.0–546.0)                   | 24.8(1.0–153.0)                  | 0.256   |
| ≥ 100 × 10 <sup>9</sup> /L      | 38.1                              | 28.6                             | 0.721   |
| HGB, g/L                        |                                   |                                  |         |
| median (range)                  | 114.0(56.0–151.0)                 | 144.0(90.0–171.0)                | 0.039   |
| PLT, ×10 <sup>9</sup> /L        |                                   |                                  |         |
| median (range)                  | 45.0(17.0–219.0)                  | 86.0(22.0–223.0)                 | 0.521   |
| LDH (u/L)                       |                                   |                                  |         |
| median (range)                  | 755.0(131.0–4263.0)               | 1717.0(205.0–4905.0)             | 0.344   |
| Blasts (%) median (range)       |                                   |                                  |         |
| bone marrow                     | 80.2(24.0–98.8)                   | 75.9(20.0–95.6)                  | 0.548   |
| peripheral blood                | 82.0(4.0–94.4)                    | 33.0(1.0–84.0)                   | 0.032   |
| Immune phenotype (%)            |                                   |                                  |         |
| CD34+                           | 71.4                              | 21.4                             | 0.006   |
| CD13+                           | 52.4                              | 21.4                             | 0.089   |
| CD33+                           | 61.9                              | 21.4                             | 0.036   |
| Extramedullary infiltration (%) |                                   |                                  |         |
| liver                           | 28.6                              | 0.0                              | 0.061   |
| spleen                          | 57.1                              | 28.6                             | 0.166   |
| lymph node                      | 90.5                              | 57.1                             | 0.039   |
| Genetics (%)                    |                                   |                                  |         |
| NOTCH1 mutation                 | 81.3                              | 72.7                             | 0.662   |
| FBWB7 mutation                  | 6.3                               | 27.3                             | 0.273   |
| PTEN mutation                   | 17.6                              | 7.1                              | 0.607   |
| PHF6 mutation                   | 28.6                              | 25.0                             | 1.000   |
| DNM2 mutation                   | 81.0                              | 92.9                             | 0.627   |
| IL7R mutation                   | 5.3                               | 15.4                             | 0.552   |
| complex karyotype               | 20.0                              | 14.3                             | 1.000   |

**Supplementary Table S3: CRLF2 primer for qChIP**

|                                                |                                              |
|------------------------------------------------|----------------------------------------------|
| CRLF2-P1-F: 5'-GTGAGCCAAGATCGTGC               | CRLF2-P1-R: 5'-GAGCTGGAGTCTCACTC             |
| CRLF2-p2-F: 5'-AGG GGA AGG GAG GGG AAG GGA AAG | CRLF2-P2-R: 5'-CCC TTT CCT CCC CTC CCC TCC T |
| CRLF2-P3-F: 5'-AAGTGAAAGGAAGGGAAGGGAGGGGA      | CRLF2-P3-R: 5'-CCT TTC CCT TCC CCT CCC CTC C |
| CRLF2-P4-F: 5'-CACTGTGCTTCCTGCCTGTAAT          | CRLF2-P4-R: 5'-AGAGGTCACCATCGATTTTAAAAAGT    |
| CRLF2-P5-F: 5'-GCAAGGAGGAGCAGGTAATTATT         | CRLF2-P5-R: 5'-CAAAGCAAACCACAAACCAAAA        |
